# Supplementary material for: Pregnancy exposure to organophosphate esters and the risk of attention-deficit hyperactivity disorder in the Norwegian mother, father and child cohort study
Source: PubMed Central journal article supplement — Environ Int. Author manuscript; Available in PMC 2021 Sep 1. (PMC8217330; doi:10.1016/j.envint.2021.106549), 2021-04-25
Supplement: NIHMS1697401-supplement-1.pdf [file NIHMS1697401-supplement-1.pdf]

## 1. Supplemental material

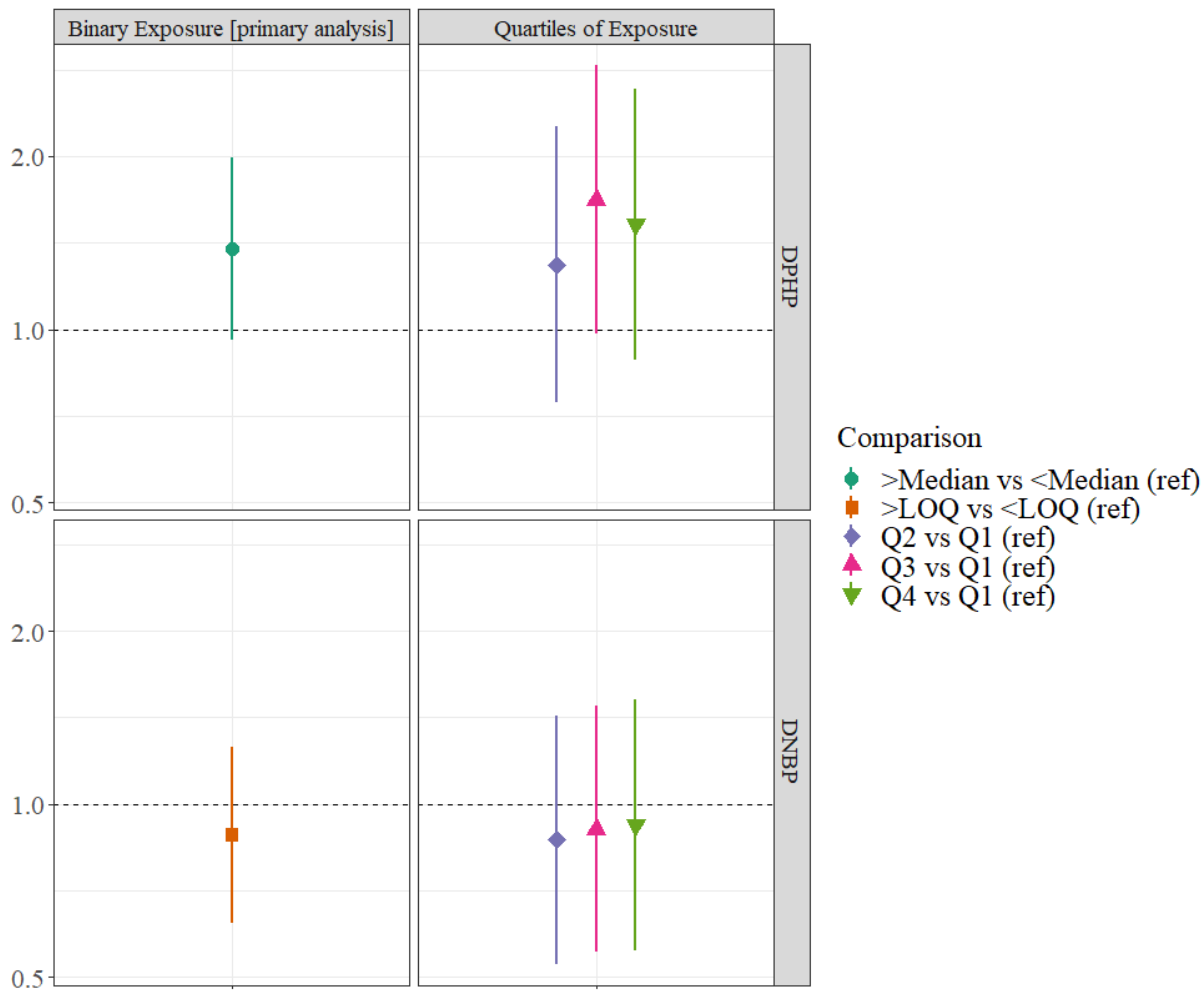

Supplementary Figure 1 Risk ratios of attention-deficit hyperactivity disorder associated with increased organophosphate ester exposure based on binary classification (primary analysis) or quartiles, pooled across multiply imputed datasets (m=20; 295 cases; 555 sub-cohort).

Abbreviations:

Q1, 0-25th percentile; Q2, 25-50th percentile; Q3, 50-75th percentile; Q4, 75-100th percentile; DPHP, diphenyl phosphate; DNBP, di-n-butyl phosphate.

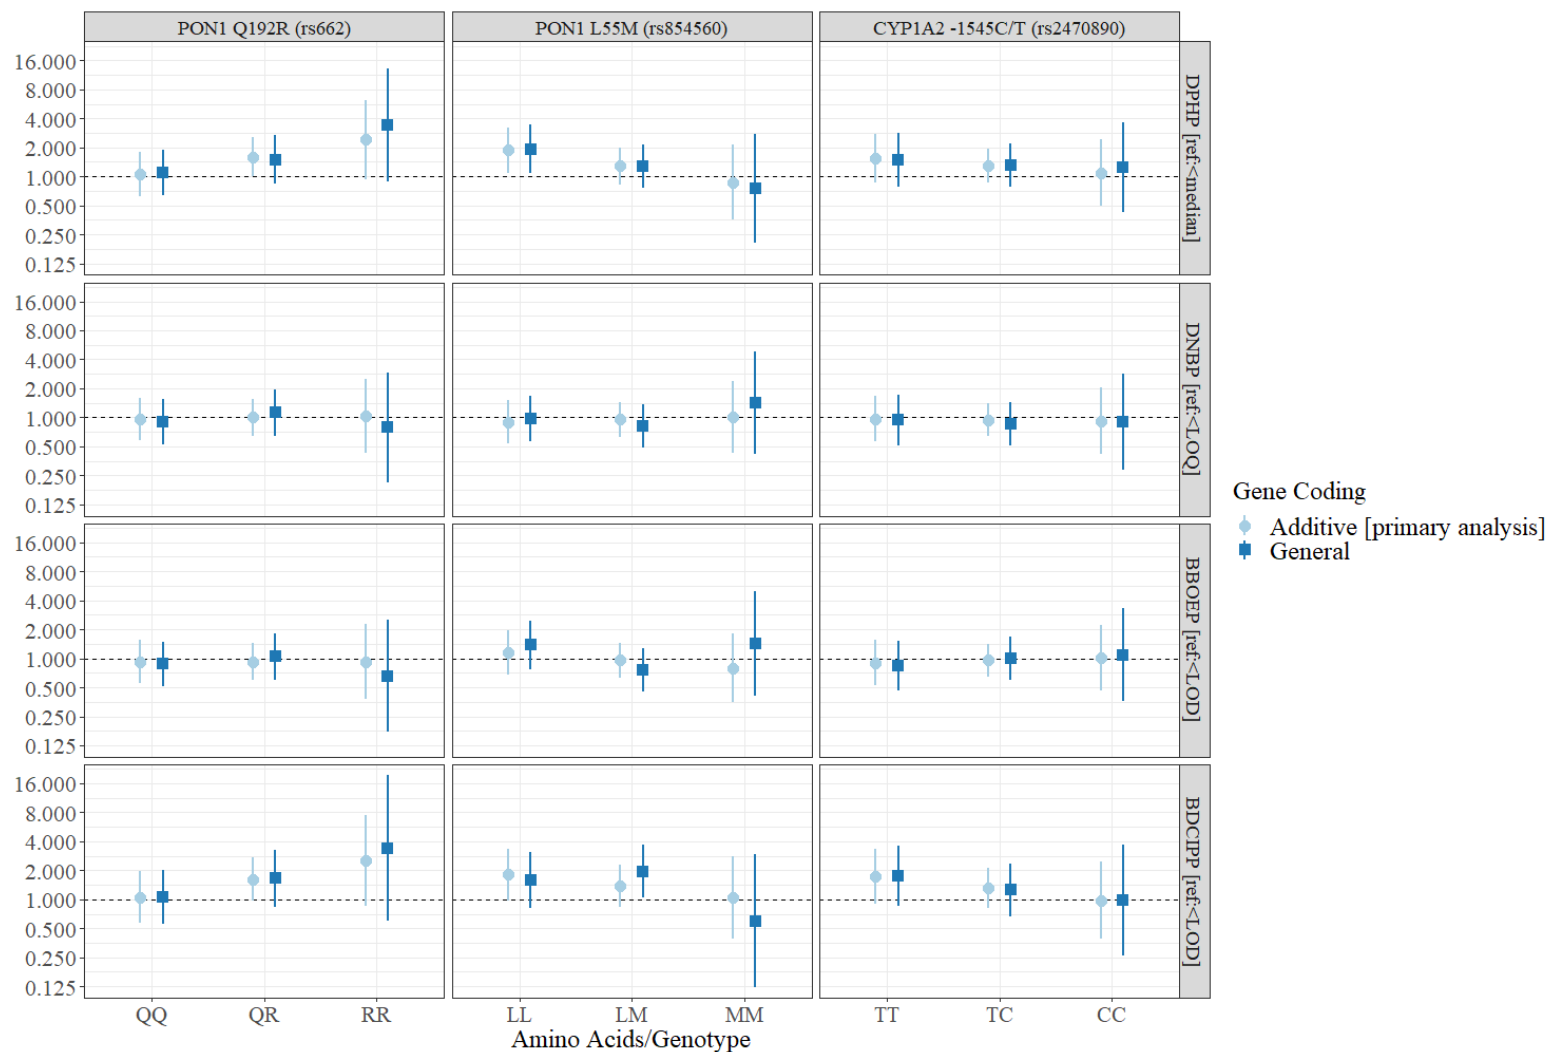

Supplementary Figure 2 Risk of attention-deficit hyperactivity disorder in children with prenatal organophosphate ester exposure above threshold relative to those below the threshold, stratified by amino acid/genotype coded with an additive (continuous) or general (categorical) model.

Abbreviations: DPHP, diphenyl phosphate; DNBP, di-n-butyl phosphate; BBOEP, bis(2-butoxyethyl) hydrogen phosphate; BDCIPP, bis(1,3-dichloro-2-propyl) phosphate; LOD, limit of detection; LOQ, limit of quantification.

Supplementary Table 1 Frequencies (%) of maternal and fetal amino acids/genotype by ADHD case and sub-cohort status.

| Gene          | SNPs (rs#)              | Amino acids/<br>Genotype | Case group (N=295) |            | Sub-cohort (N=555) |            |
|---------------|-------------------------|--------------------------|--------------------|------------|--------------------|------------|
|               |                         |                          | Maternal gene      | Fetal gene | Maternal gene      | Fetal gene |
| <i>PONI</i>   | Q192R<br>(rs662)        | Missing                  | 19                 | 122        | 17                 | 127        |
|               |                         | QQ                       | 126 (46%)          | 75 (43%)   | 290 (54%)          | 238 (56%)  |
|               |                         | QR                       | 120 (43%)          | 81 (47%)   | 209 (39%)          | 161 (38%)  |
|               |                         | RR                       | 30 (11%)           | 17 (10%)   | 39 (7%)            | 29 (7%)    |
|               | L55M<br>(rs854560)      | Missing                  | 14                 | 122        | 19                 | 127        |
|               |                         | LL                       | 125 (44%)          | 82 (47%)   | 216 (40%)          | 189 (44%)  |
|               |                         | LM                       | 127 (45%)          | 76 (44%)   | 256 (48%)          | 197 (46%)  |
|               | MM                      | 29 (10%)                 | 15 (9%)            | 64 (12%)   | 42 (10%)           |            |
| <i>CYP1A2</i> | -1545C/T<br>(rs2470890) | Missing                  | 18                 | 121        | 16                 | 129        |
|               |                         | TT                       | 112 (40%)          | 70 (40%)   | 216 (40%)          | 163 (38%)  |
|               |                         | TC                       | 122 (44%)          | 72 (41%)   | 255 (47%)          | 208 (49%)  |
|               |                         | CC                       | 43 (16%)           | 32 (18%)   | 68 (13%)           | 55 (13%)   |

Supplementary Table 2 Comparison of the median concentrations ( $\mu\text{g/L}$ ) of urinary DPHP, BDCIPP, DNBP, and BBOEP observed among the control mothers in the current study with previous reports (specific gravity adjusted geometric mean in parenthesis)

| Population                      | Author, year            | N    | Years     | Location        | Average age $\pm$ SD<br>(min-max) | Gestational weeks           | DPHP           | BDCIPP          | DNBP             | BBOEP            |
|---------------------------------|-------------------------|------|-----------|-----------------|-----------------------------------|-----------------------------|----------------|-----------------|------------------|------------------|
| Pregnant women                  | Current study           | 555  | 2003-2008 | Oslo, Norway    | $30.9 \pm 4.22$                   | 17                          | 0.45<br>(0.52) | <0.17<br>(0.19) | 0.22<br>(0.25)   | 0.07<br>(0.08)   |
|                                 | (Romano et al. 2017)    | 59   | 2014-2015 | RI, US          | $29.5 \pm 4.5$                    | 12                          | 0.86           | 1.09            | .                | .                |
|                                 | (Feng et al. 2016)      | 23   | 2015      | Shanghai, China | (25-40)                           | 28                          | 1.06           | 1.39            | .                | .                |
|                                 | (Kosarac et al. 2016)   | 24   | 2010-2012 | Ontario, Canada | (18-45)                           | 2 <sup>nd</sup> trimester   | 0.83           | 1.58            | .                | .                |
|                                 | (Hoffman et al. 2017b)  | 349  | 2001-2006 | NC, US          | 29.6                              | 2-3 <sup>rd</sup> trimester | 2.94           | 0.26            | .                | <0.08            |
|                                 | (Castorina et al. 2017) | 310  | 1999-2000 | CA, US          | $26 \pm 5.2$                      | 24-30                       | 0.77<br>(1.4)  | 1.02<br>(1.8)   | .                | .                |
| Women Undergoing IVF cycles     | (Carignan et al. 2017)  | 211  | 2005-2015 | MA, US          | 35                                | .                           | 0.79<br>(0.81) | 0.69<br>(0.68)  | .                | .                |
| Mothers from mother-child dyads | (Butt et al. 2016)      | 28   | 2015      | CA, US          | (18-)                             | .                           | 0.80<br>(1.2)  | 1.90<br>(3.3)   | .                | .                |
|                                 | (Butt et al. 2014)      | 22   | 2013-2014 | NJ, US          | (18-)                             | .                           | (1.9)          | (2.4)           | .                | .                |
|                                 | (Cequier et al. 2015)   | 48   | 2012      | Norway          | (32-56)                           | .                           | 0.51<br>(0.61) | 0.12<br>(0.15)  | <0.12<br>(<0.12) | <0.18<br>(<0.18) |
| Females from NHANES             | (Ospina et al. 2018)    | 2666 | 2013-2014 | US              | (6-)                              | .                           | 0.89           | 0.82            | 0.24             | .                |

Abbreviations:

DPHP, diphenyl phosphate; DNBP, di-n-butyl phosphate; BBOEP, bis(2-butoxyethyl) hydrogen phosphate; BDCIPP, bis(1,3-dichloro-2-propyl) phosphate; SD, standard deviation.
